# Supplementary material
Source: PubMed Central journal article supplement (PMC6201076)
Supplement: zac011187552s1.pdf [file zac011187552s1.pdf]

**Nitazoxanide inhibits human norovirus replication and synergizes with ribavirin  
by activation of cellular antiviral response**

Wen Dang,<sup>a</sup> Lei Xu,<sup>a#</sup> Buyun Ma,<sup>a#</sup> Sunrui Chen,<sup>a</sup> Yuebang Yin,<sup>a</sup> Kyeong-Ok Chang,<sup>b</sup>  
Maikel P. Peppelenbosch,<sup>a</sup> Qiuwei Pan<sup>a\*</sup>

<sup>a</sup>Department of Gastroenterology and Hepatology, Erasmus MC-University Medical  
Center, Rotterdam, Netherlands

<sup>b</sup>Department of Diagnostic Medicine and Pathobiology, College of Veterinary Medicine,  
Kansas State University, USA

## Supplementary Methods

### Reverse transcription PCR (RT-PCR)

Two primer sets were designed to detect HuNV replicons in HG23 cells. The primer pair designated Neo-F and Neo-R is located in the neomycin resistant gene (1) and is predicted to produce a product of 804 bases. Primers NVp36/35 are located in a highly conserved RNA polymerase region of HuNV GI genome and are predicted to give a product of 470 bases (2). For RT, cDNA was reverse transcribed from extracted cellular RNA by using Takara PrimeScript™ RT reagent Kit according to the manufacturer's instructions. Briefly, 8 µL of total cellular RNA (500 ng) was mixed with 2 µL of 5x PrimeScript Buffer on ice. The mixture was incubated at 37°C for 15 mins; this was followed by heat inactivation at 85°C for 5 s. The mixture was 20 times diluted and stored at -20°C for further use. PCR was performed using Q5® High-Fidelity DNA polymerase kit (New England Biolabs Inc.) in a 25 µL reaction mixture containing 5 µL of 5x Q5 Reaction Buffer, 0.5 µL of a 10 mM dNTPs, 1.25 µL of 10 µM Forward Primer, 1.25 µL of 10 µM Reverse Primer, 5 µL of template cDNA and 0.25 µL of Q5 High-Fidelity DNA Polymerase. Amplification was carried out with initial denaturation at 98°C [30 s]; 30 cycles of 98°C [10 s], 50-70°C [30 s] and 72 °C [30 s]; and an additional extension step of 72°C for 2 min. The GAPDH primer set was used as a reference gene and was amplified in 25 cycles (3). The products were loaded onto 1-2% agarose gel containing SERVA DNA Stain G. DNA electrophoresis at 100 V for 45 min was performed. 100 bp DNA ladder (Promega) was also electrophoresed on each gel. Bands were visualized and recorded with the Gel.Doc 2000 system (Bio-Rad). All primer combinations were listed in Table S2.

## **MTT assay**

Cytotoxicity of the compounds on host cells were determined by 3-(4,5-dimethyl-2-thiazolyl)-2,5-diphenyl-2H-tetrazolium bromide (MTT) assay. In brief, cells were seeded into 96-well plates containing 0.05% DMSO (control) or increasing concentrations of drugs. After the time indicated, 10 mM MTT (Sigma, Zwijndrecht, Netherlands) was added. With another 3 hours of incubation, the medium was removed and 100  $\mu$ L DMSO was added to each well. The plate was incubated at 37°C for 50 min. The absorbance at 490 nm was recorded on the microplate absorbance reader (Bio-Rad, CA, USA).

**Table S1** Overview of culture medium components for human intestinal organoids.

| Components                             | Storage (°C) | Stocks             | Final              | Company        |
|----------------------------------------|--------------|--------------------|--------------------|----------------|
| Wnt 3a                                 | 4            | Conditioned medium | 50%                | Self-produced  |
| R-Spondin 1                            | -20          | Conditioned medium | 20%                | Self-produced  |
| Noggin                                 | -20          | Conditioned medium | 10%                | Self-produced  |
| B27                                    | -20          | 50x                | 1                  | Gibco          |
| N2                                     | -20          | 100x               | 1                  | Gibco          |
| N-Acetylcysteine (mol/L)               | -20          | 0.5                | $1 \times 10^{-3}$ | Invitrogen     |
| Nicotinamide (mol/L)                   | -20          | 1                  | $1 \times 10^{-2}$ | Sigma-Aldrich  |
| A83-01 (TGF-beta inhibitor) (mol/L)    | -20          | $5 \times 10^{-4}$ | $5 \times 10^{-7}$ | Tocris         |
| SB202190 (p38 inhibitor) (mol/L)       | -20          | $3 \times 10^{-2}$ | $3 \times 10^{-6}$ | Sigma-Aldrich  |
| Human EGF (g/L)                        | -20          | $5 \times 10^{-2}$ | $5 \times 10^{-5}$ | Sigma-Aldrich  |
| Prostaglandin E2 (mol/L)               | -20          | $1 \times 10^{-4}$ | $1 \times 10^{-8}$ | PeptoTech      |
| Gastrin (mol/L)                        | -20          | $1 \times 10^{-4}$ | $1 \times 10^{-8}$ | PeptoTech      |
| Y-27632 (Rho kinase inhibitor) (mol/L) | -20          | $1 \times 10^{-2}$ | $1 \times 10^{-5}$ | Bio-Connect BV |

**Table S2** Primers used by qRT-PCR.

| Name                     | Sequences <sup>a</sup>                               | Location          |
|--------------------------|------------------------------------------------------|-------------------|
| HuNoV GI-specific primer | COG1F (+): 5'- CGYTGGATGCGNTTYCATGA-3' <sup>b</sup>  | 5291 <sup>b</sup> |
|                          | COG1R (-): 5'- CTTAGACGCATCATCATTYAC-3' <sup>b</sup> | 5375 <sup>b</sup> |
| FeCV                     | F: 5'- GAACTACCCGCCAATCAACAT -3'                     | 2420-2440         |
|                          | R: 5'- CGGCTCTGATGGCTTGAAACTG-3'                     | 2507-2528         |
| DDX60                    | F: 5'-GGTGTTCACCAGGGAGTATCG-3'                       |                   |
|                          | R: 5'-CCAGTTTTGGCGATGAGGAGCA-3'                      |                   |
| Human GAPDH              | F: 5'-TGTCCCCACCCCAATGTATC-3'                        |                   |
|                          | R: 5'-CTCCGATGCCTGCTTCACTACCTT-3'                    |                   |
| Feline GAPDH             | GAPDH.57f: 5'- GCCGTGGAATTTGCCGT-3'                  |                   |
|                          | GAPDH.138r: 5'- GCCATCAATGACCCCTTCAT-3'              |                   |
| IFIT1                    | F: 5'-GCCTTGCTGAAGTGTGGAGGAA-3'                      |                   |
|                          | R: 5'-ATCCAGGCGATAGGCAGAGATC-3'                      |                   |
| IRF9                     | F: 5'- CCACCGAAGTTCAGGTAACAC-3'                      |                   |
|                          | R: 5'- AGTCTGCTCCAGCAAGTATCGG-3'                     |                   |
| IFI27                    | F: 5'- CGTCCTCCATAGCAGCCAAGAT-3'                     |                   |
|                          | R: 5'- ACCCAATGGAGCCCAGGATGAA-3'                     |                   |
| IFITM3                   | F: 5'-CTGGGCTTCATAGCATTTCGCCT-3'                     |                   |
|                          | R: 5'-AGATGTTTCAGGCACTTGGCGGT-3'                     |                   |
| ISG15                    | F: 5'-CTCTGAGCATCCTGGTGAGGAA-3'                      |                   |
|                          | R: 5'-AAGGTCAGCCAGAACAGGTCGT-3'                      |                   |
| IRF-1                    | F: 5'-GAGGAGGTGAAAGACCAGAGCA-3'                      |                   |
|                          | R: 5'-TAGCATCTCGGCTGGACTTCGA-3'                      |                   |
| IFI6                     | F: 5'-TGATGAGCTGGTCTGCGATCCT-3'                      |                   |
|                          | R: 5'-GTAGCCCATCAGGGCACCAATA-3'                      |                   |

---

|              |                                                                      |
|--------------|----------------------------------------------------------------------|
| MDA5 (IFIH1) | F: 5'-GCTGAAGTAGGAGTCAAAGCCC-3'<br>R: 5'-CCACTGTGGTAGCGATAAGCAG-3'   |
| Mx1          | F: 5'- GGCTGTTTACCAGACTCCGACA-3'<br>R: 5'- CACAAAGCCTGGCAGCTCTCTA-3' |
| OAS3         | F: 5'-CCTGATTCTGCTGGTGAAGCAC-3'<br>R: 5'-TCCCAGGCAAAGATGGTGAGGA-3'   |
| OASL         | F: 5'-GTGCCTGAAACAGGACTGTTGC-3'<br>R: 5'-CCTCTGCTCCACTGTCAAGTGG-3'   |
| PKR          | F: 5'-GAAGTGGACCTCTACGCTTTGG-3'<br>R: 5'-TGATGCCATCCCGTAGGTCTGT-3'   |
| RIG-I        | F: 5'-CACCTCAGTTGCTGATGAAGGC-3'<br>R: 5'-GTCAGAAGGAAGCACTTGCTACC-3'  |
| RSDA2        | F: 5'-CCAGTGCAACTACAAATGCGGC-3'<br>R: 5'-CGGTCTTGAAGAAATGGCTCTCC-3'  |

---

<sup>a</sup>Y = C + T; R = A + G; W = A+T; N = any

<sup>b</sup>Corresponding nucleotide position of Norwalk/68 virus (accession no. M87661) of the 5'end.

**Table S3** Primers used by RT-PCR.

| Target                         | Primer                  |       | Sense | Sequence (5'-3') <sup>a</sup> | Location                   | Annealing |
|--------------------------------|-------------------------|-------|-------|-------------------------------|----------------------------|-----------|
| HuNV                           | HuNV<br>GI-<br>specific | NVp36 | +     | ATAAAAGTTGGCATGAACA           | 4487-<br>4505 <sup>b</sup> | 57°C      |
|                                |                         | NVp35 | -     | CTTGTTGGTTTGAGGCCATAT         | 4936-<br>4956 <sup>b</sup> |           |
| Neomycin<br>phosphotransferase | Neo-F                   |       | +     | ATGGGATCGGCCATTGAAC           |                            | 59°C      |
|                                | Neo-R                   |       | -     | TCAGAAGAACTCGTCAAG            |                            |           |
| GAPDH                          | GAPDH-F                 |       | +     | TCGTGGAAGGACTCATGACC          |                            | 68°C      |
|                                | GAPDH-R                 |       | -     | TCCACCACCCTGTTGCT             |                            |           |

<sup>a</sup>Y = C + T; M = A + C; D = A+T+G; W = A+T

<sup>b</sup>Nucleotide positions are the positions in Hu/NLV/Norwalk/68/US (accession no. M87661).

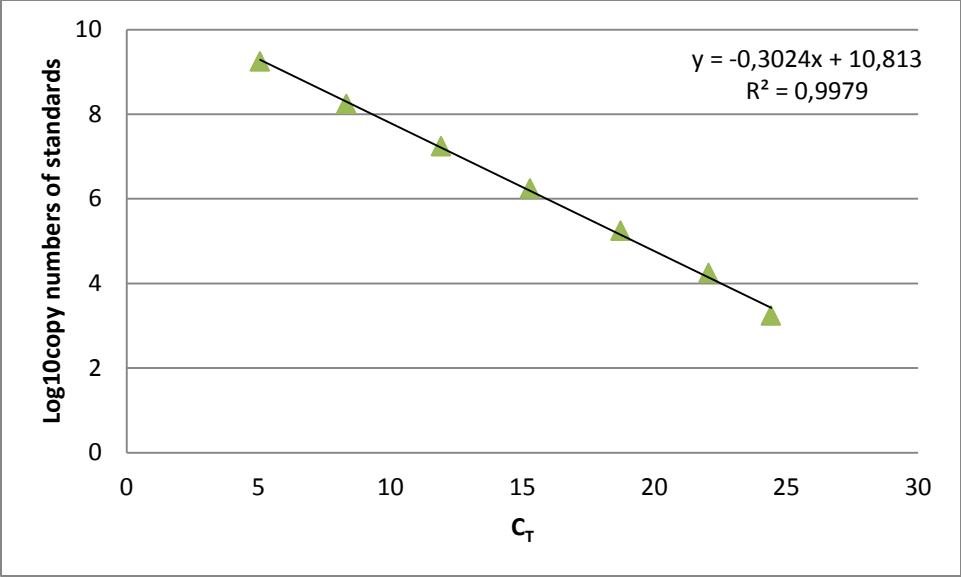

**Fig. S1** Standard curve for quantifying FeCV genome copy numbers.



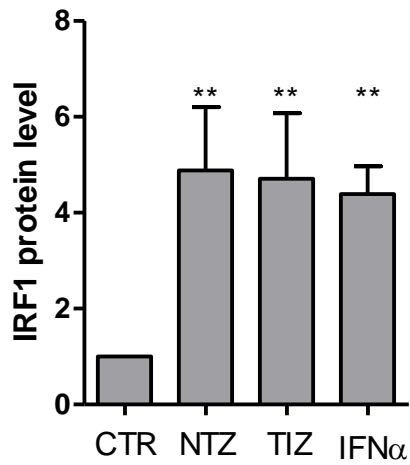

**Fig. S2** Densitometric analysis of western blot of IRF-1 protein expression after treatment with NTZ (10  $\mu\text{g}/\text{mL}$ ), TIZ (10  $\mu\text{g}/\text{mL}$ ), IFN $\alpha$  (1000 IU/mL) or matched concentration of DMSO as vehicle control (CTR). The data were plotted as means  $\pm$  SEM and statistical comparisons were analyzed by t test (n = 5). \*\*P < 0.01.

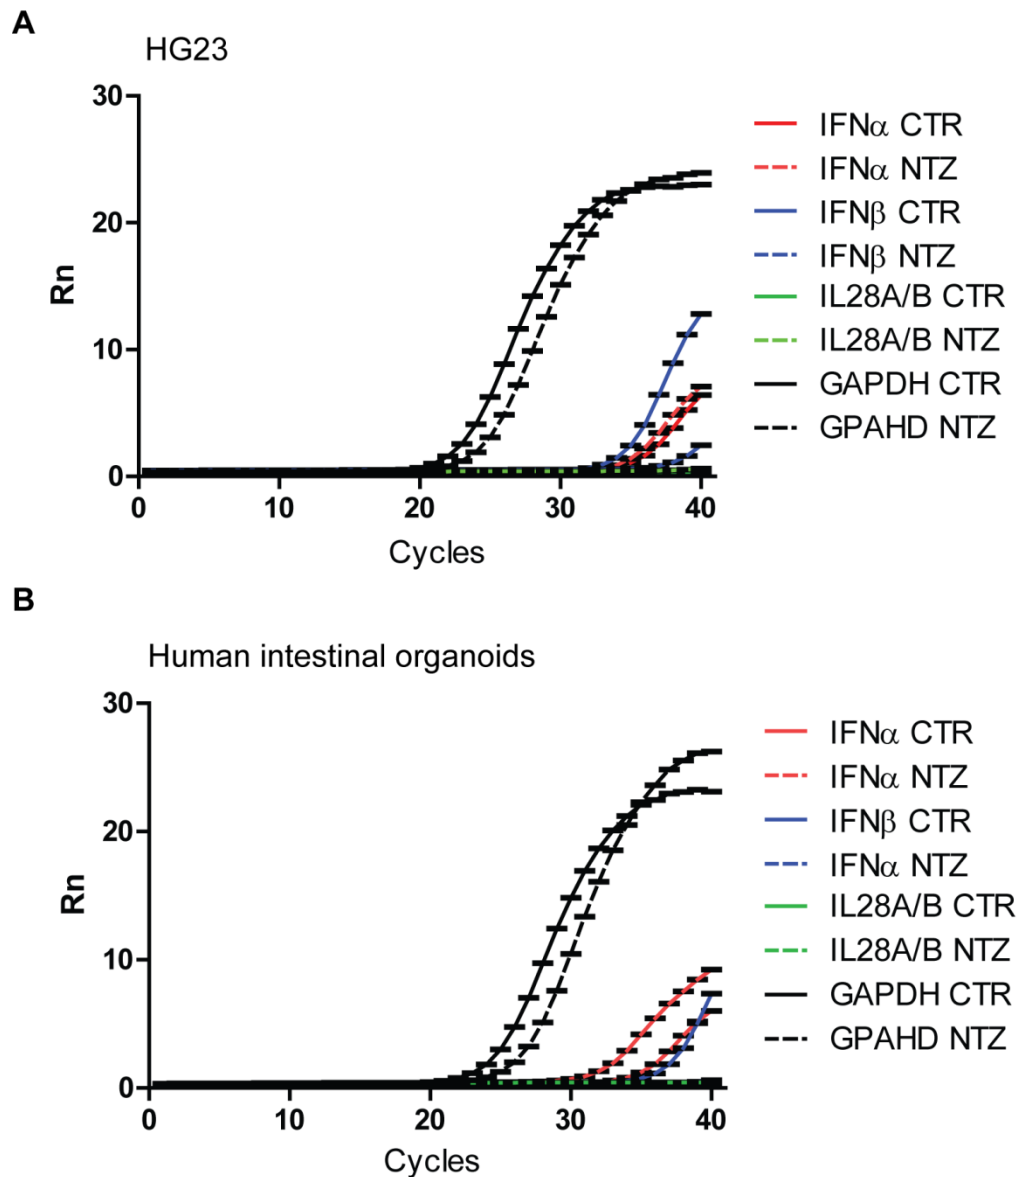

**FIG S3** NTZ had no major effects on the induction of IFN genes. qRT-PCR analysis of IFN genes including IFN $\alpha$ , IFN $\beta$  and IL28A/B after NTZ treatment (10  $\mu$ g/mL for 2 days) in HG23 (A) and human intestinal organoids (B). Data were representative of 3 independent experiments.

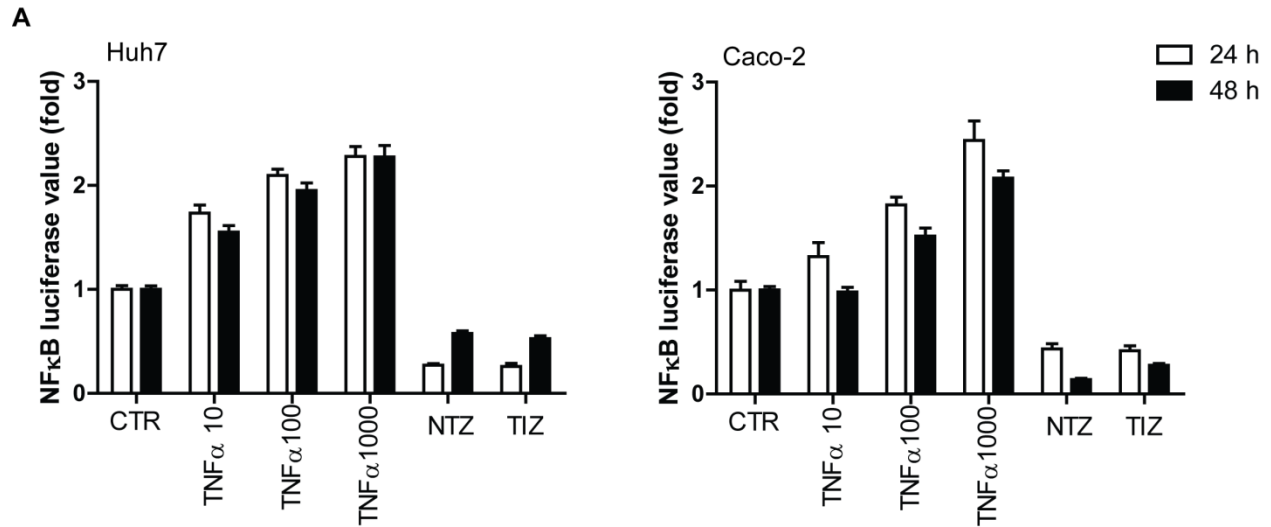

**Figure S4 Stimulation of ISGs by TZD was independent of NF $\kappa$ B pathway.** Huh7 and Caco-2-based NF $\kappa$ B luciferase reporter cells were mock-treated (DMSO) or stimulated for 24 and 48 hours with TNF $\alpha$  (10, 100 and 1000 ng/mL), NTZ (1  $\mu$ g/mL) or TIZ (1  $\mu$ g/mL). Luciferase activities were determined and normalized to the DMSO control (n = 3 independent experiments with duplicates each). TZD treatment failed to induce NF $\kappa$ B-dependent reporter gene activity.

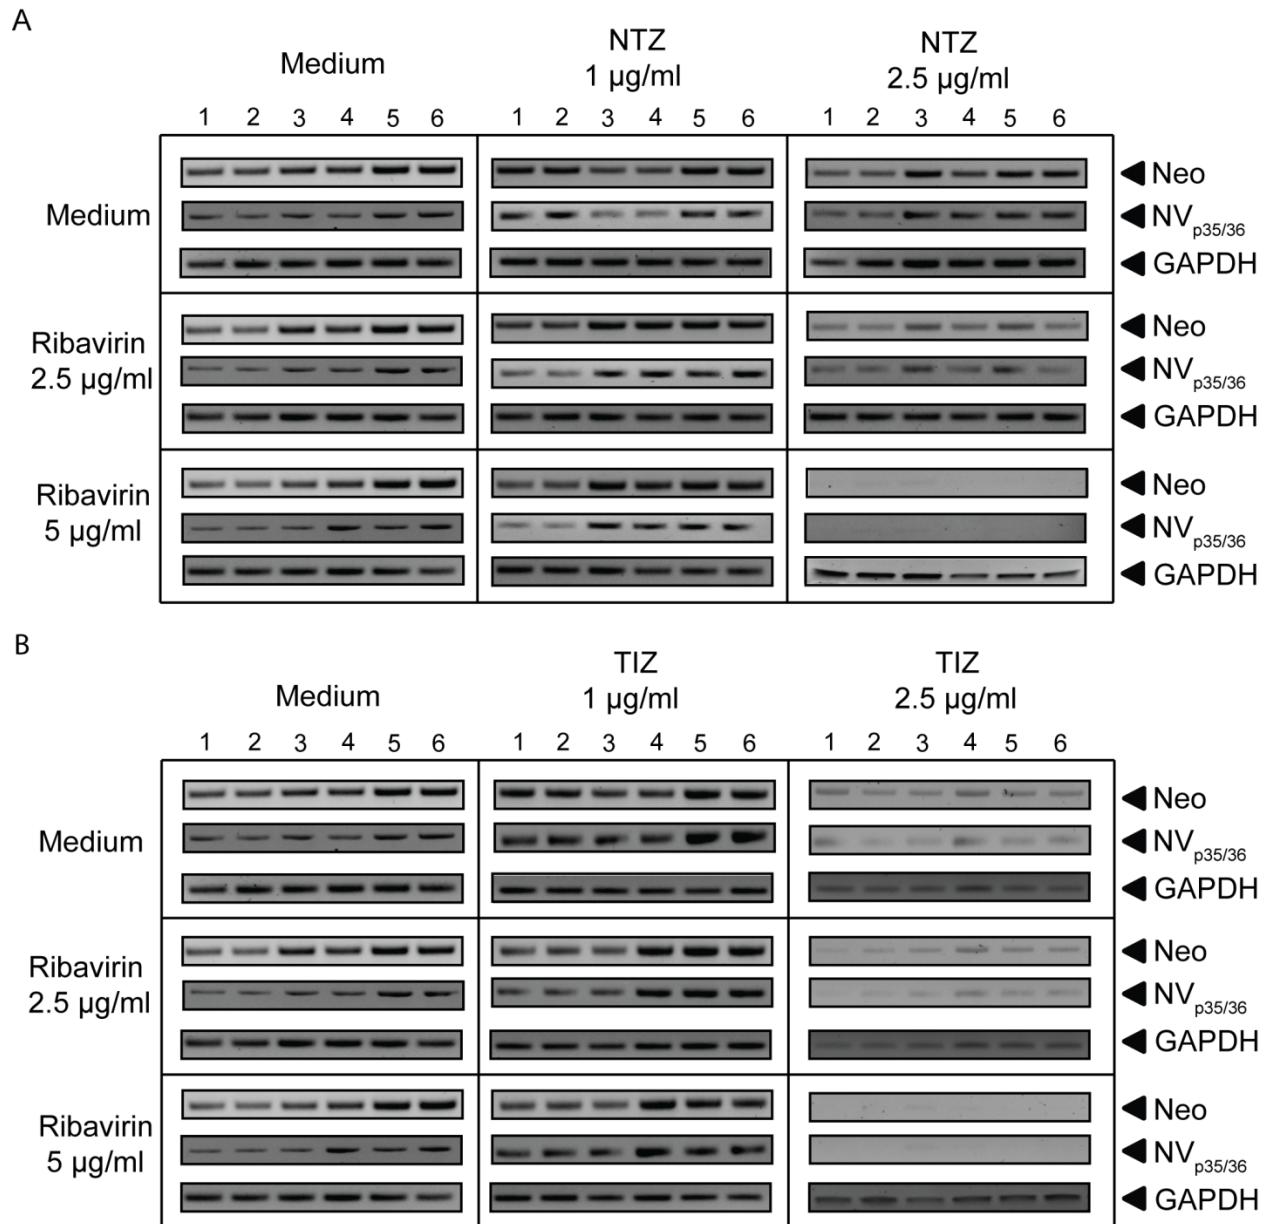

**FIG S5** Combination of TIZ with ribavirin completely depleted HuNV replicons from HG23 cells after prolonged treatment. After 10 days of treatment total cellular RNA was isolated from HG23 cells and gel-based reverse transcription polymerase chain reaction (RT-PCR) was performed to detect HuNV replicons with two primer pairs: (1) Neo-F/R were designed to amplify the full length neomycin phosphotransferase (804 bp); (2) NV<sub>p35/36</sub> specifically detected genogroup I (GI) norovirus and yielded a 470 bp DNA

amplicons. Human GAPDH primer set was used as a reference gene. A total of 6 samples were detected and were indicated by numbers.

## Supplementary Reference

1. **Chang KO, Sosnovtsev SV, Belliot G, King AD, Green KY.** 2006. Stable expression of a Norwalk virus RNA replicon in a human hepatoma cell line. *Virology* **353**:463-473.
2. **Wang J, Jiang X, Madore HP, Gray J, Desselberger U, Ando T, Seto Y, Oishi I, Lew JF, Green KY, et al.** 1994. Sequence diversity of small, round-structured viruses in the Norwalk virus group. *J Virol* **68**:5982-5990.
3. **Li Y, Pong RC, Bergelson JM, Hall MC, Sagalowsky AI, Tseng CP, Wang Z, Hsieh JT.** 1999. Loss of adenoviral receptor expression in human bladder cancer cells: a potential impact on the efficacy of gene therapy. *Cancer Res* **59**:325-330.
